# Supplementary material for: Bismuth Reduces Cisplatin-Induced Nephrotoxicity Via Enhancing Glutathione Conjugation and Vesicular Transport
Source: PubMed Central journal article supplement (PMC9243339; doi:10.3389/fphar.2022.887876), 2022-06-16
Supplement: DataSheet1.pdf [file DataSheet1.pdf]

## Supplementary Materials for

### **Bismuth reduces cisplatin-induced nephrotoxicity via enhancing glutathione conjugation and vesicular transport**

Hui Jiang<sup>1</sup>, Yifan Hong<sup>2</sup>, Guorong Fan<sup>3</sup>

<sup>1</sup> Tongji University School of Medicine, Shanghai 200092, China.

<sup>2</sup> Institute of Molecular Physiology, Shenzhen Bay Laboratory, Shenzhen 518132, China.

<sup>3</sup> Tongji University School of Medicine, Shanghai 200092, China; Department of Clinical Pharmacy, Shanghai General Hospital, School of Medicine, Shanghai Jiao Tong University, Shanghai 200025, China.

These authors contributed equally: Hui Jiang, Yifan Hong.

Correspondence: Yifan Hong: [angivan@163.com](mailto:angivan@163.com), Guorong Fan: [guorfan@163.com](mailto:guorfan@163.com)

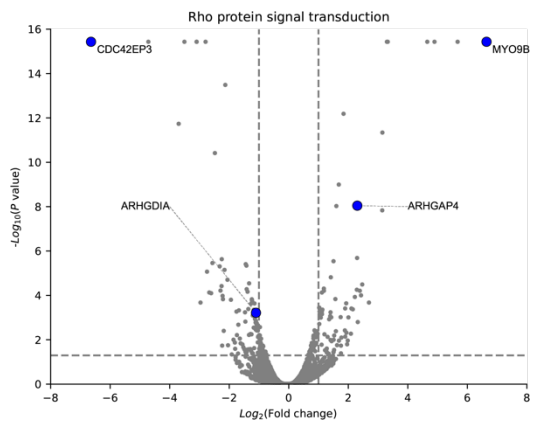

Fig. S1. Volcano plots visualizing DEPs of GO:0007266 Rho protein signal transduction in CBS-treated HK-2 cells.

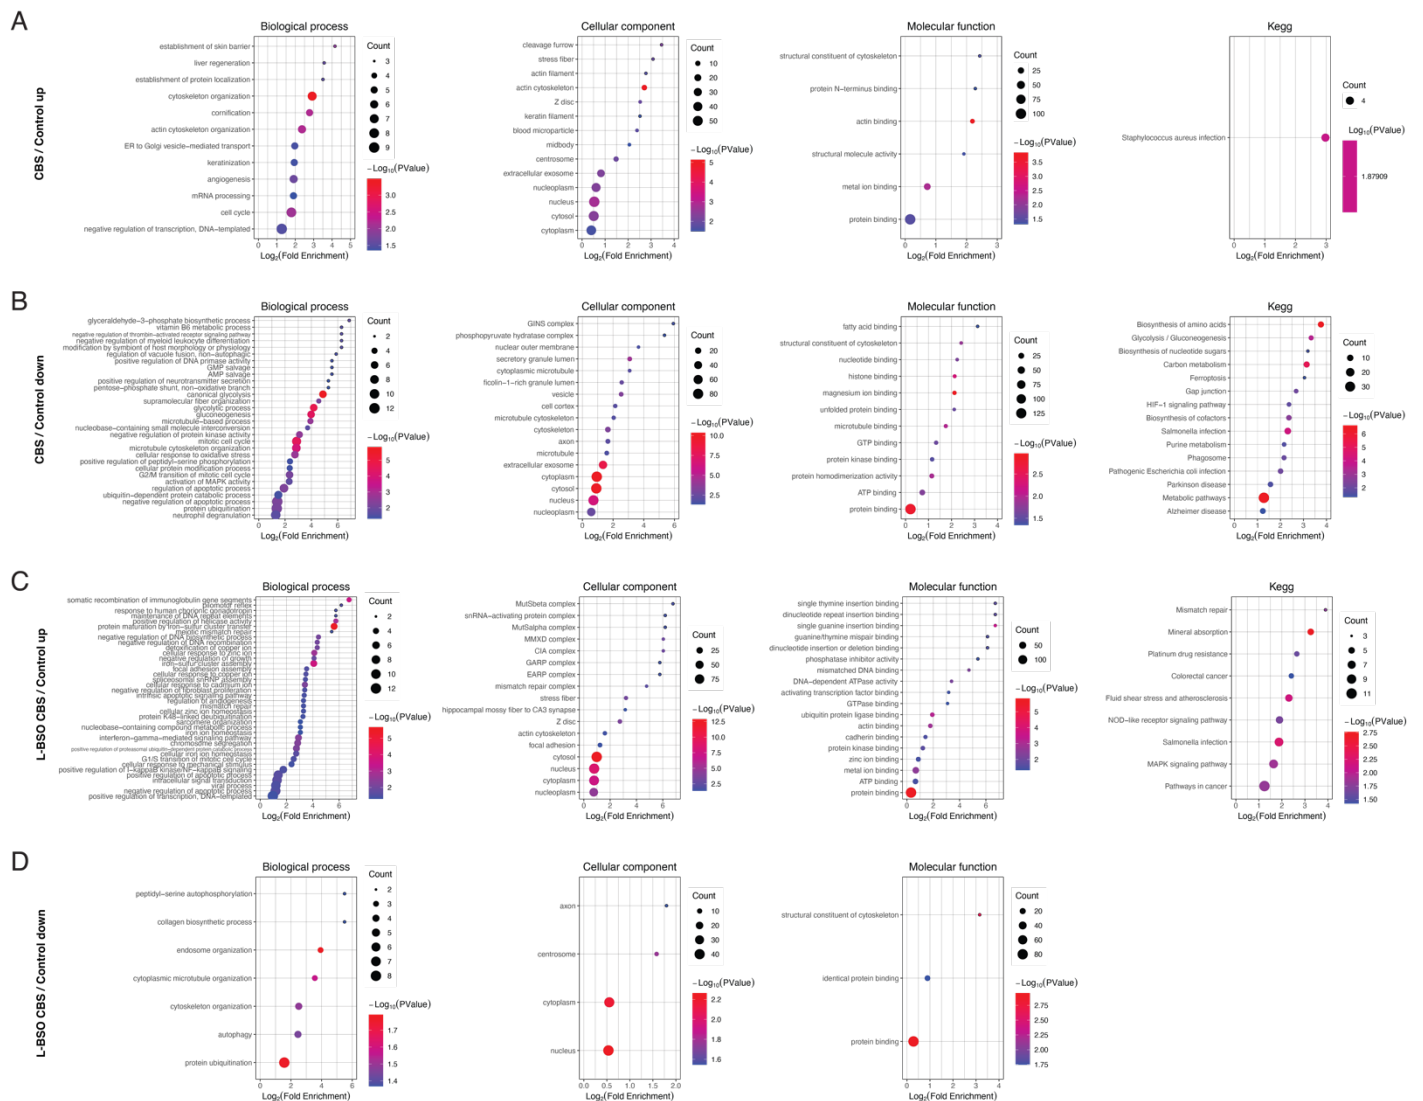

Fig. S2. Enrichment analysis of differentially expressed proteins (DEPs) in CBS-treated HK-2 cells. Enrichment analysis in perspective of Kegg, GO cellular component, molecular function and biological process of (A) up-regulated and (B) down-regulated DEPs in CBS-treated HK-2 cells, (C) up-regulated and (D) down-regulated DEPs in CBS-treated GSH-depleted HK-2 cells. The cells were treated with 500  $\mu$ M CBS for 48h, or were treated with 500  $\mu$ M L-BSO for 24h to remove GSH and then cultured with 500  $\mu$ M CBS for extra 24h.

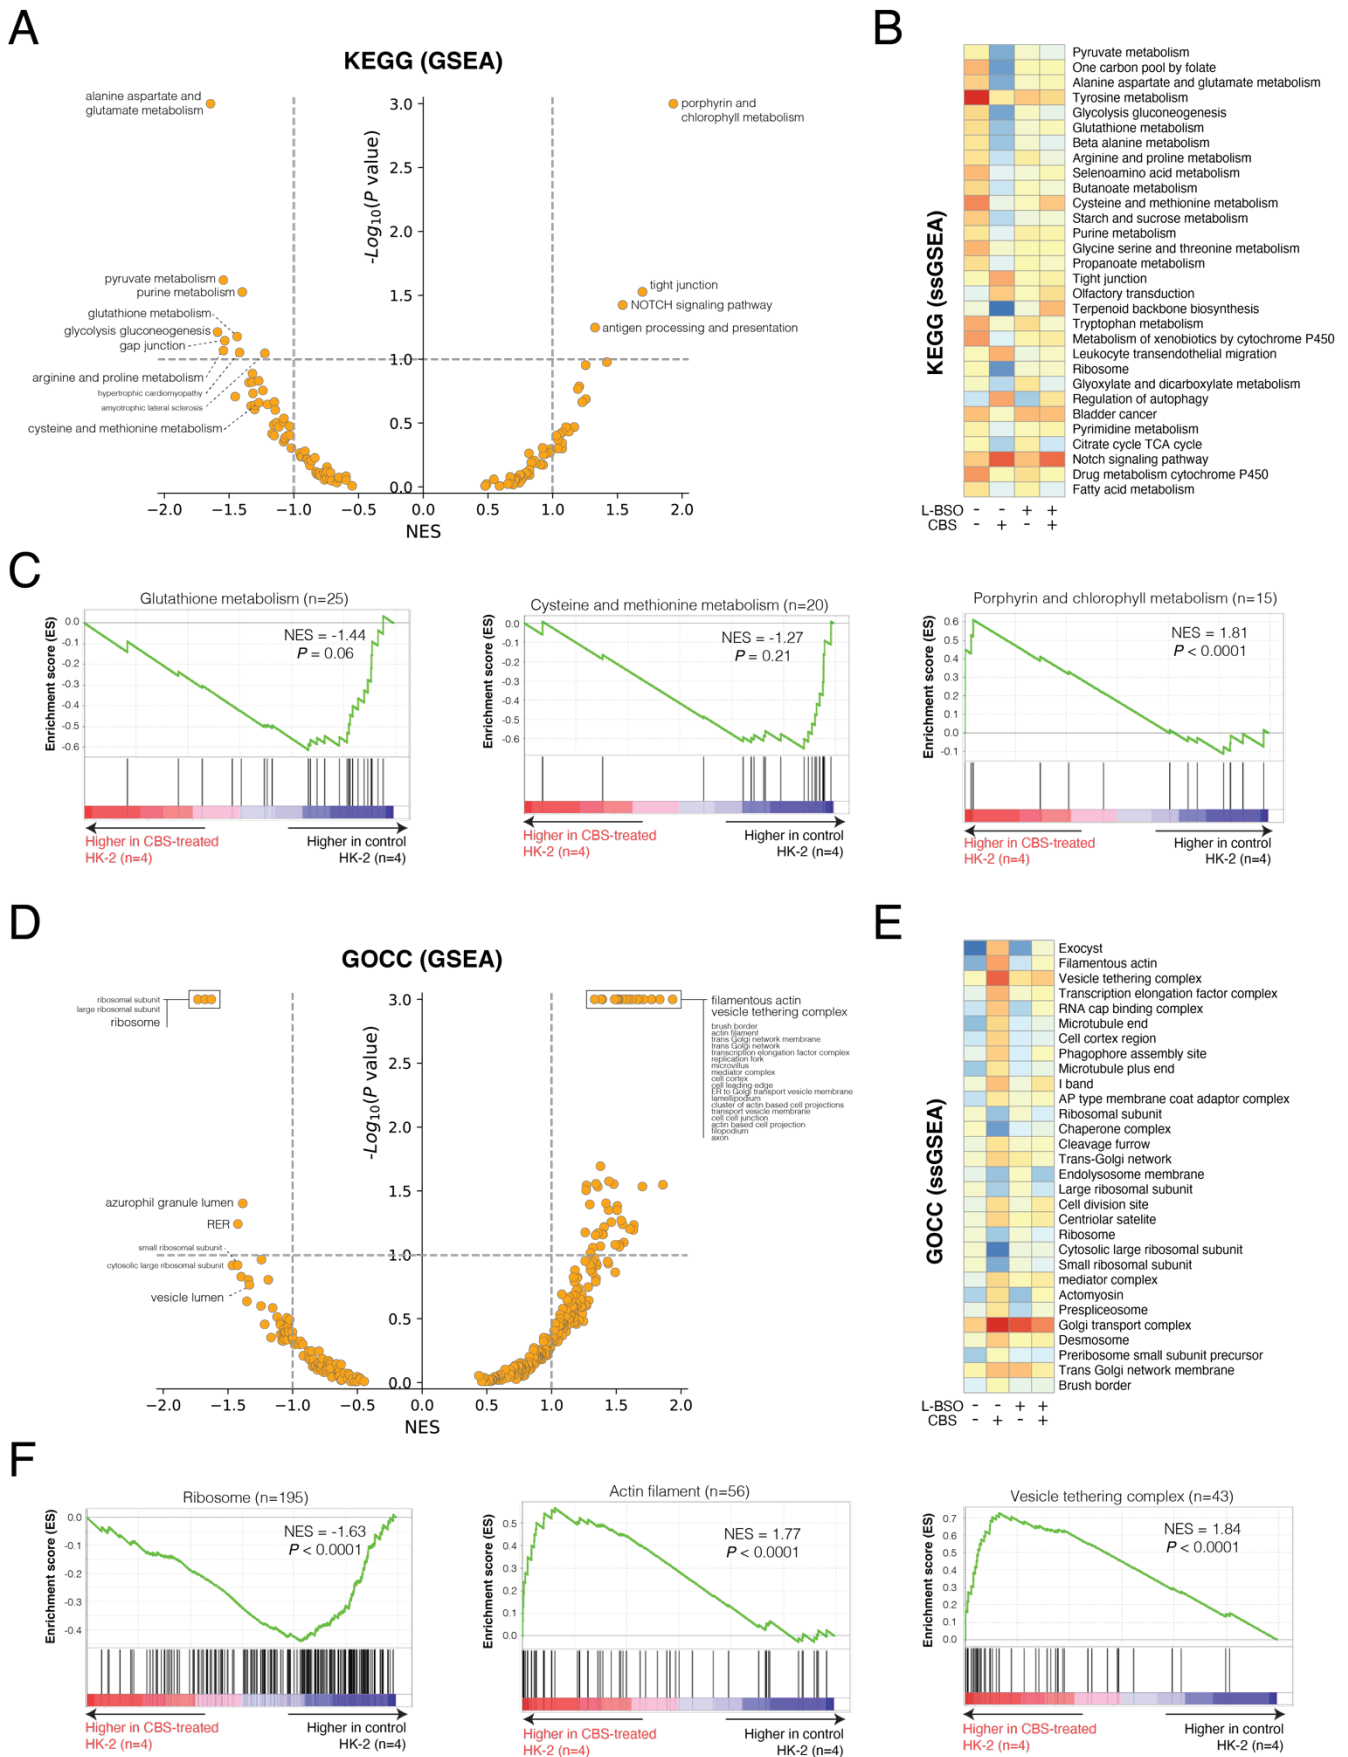

Fig. S3. GSEA analysis of proteomic changes in CBS-treated HK-2 cells.

(A) Kegg GSEA analysis of proteins from control and CBS-treated HK-2 cells. (B) Heatmap of altered pathways in perspective of Kegg (ssGSEA) from control and CBS-treated HK-2 cells. Color of each cell represents the average ssGSEA enrichment scores of that pathway; red denotes activation and blue denotes suppression. White cells represent non-enrichment. HK-2 cells treated with 500  $\mu$ M L-BSO for 24h to remove GSH were used for comparison. (C) GSEA results visualizing Kegg pathways: glutathione metabolism,

cysteine and methionine metabolism and porphyrin and chlorophyll metabolism. (D) GOCC GSEA analysis of proteins from control and CBS-treated HK-2 cells. (E) Heatmap of altered pathways in perspective of GOCC (ssGSEA) from control and CBS-treated HK-2 cells. (F) GSEA results visualizing GOCC terms: ribosome, actin filament and vesicle tethering complex.

The cells were treated with 500  $\mu\text{M}$  CBS for 48h, or were treated with 500  $\mu\text{M}$  L-BSO for 24h to remove GSH and then cultured with 500  $\mu\text{M}$  CBS for extra 24h.

**A**

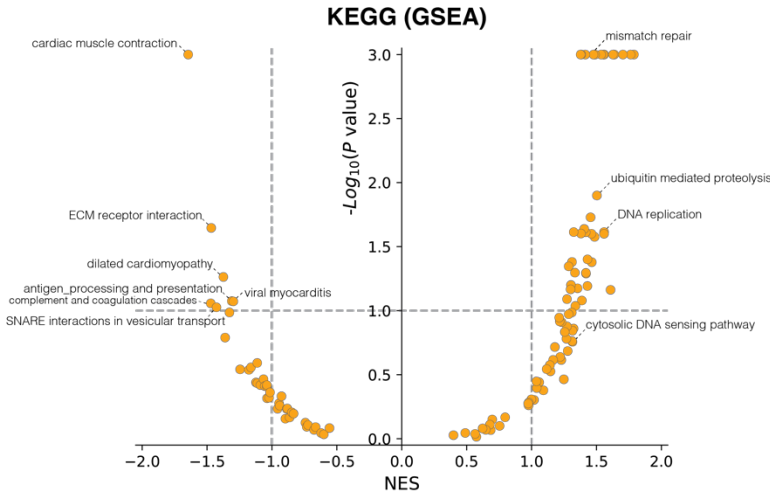

**B**

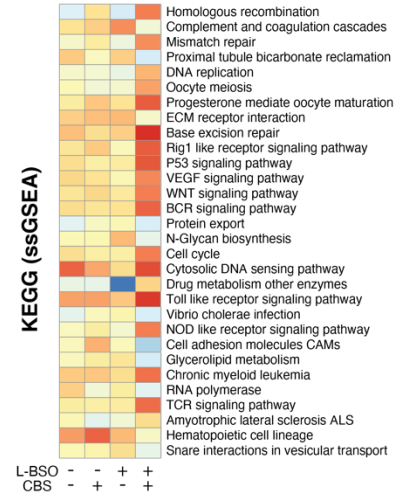

**C**

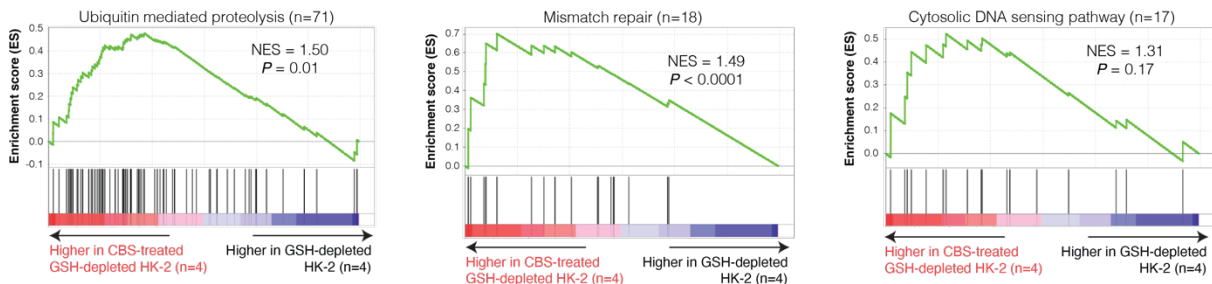

**D**

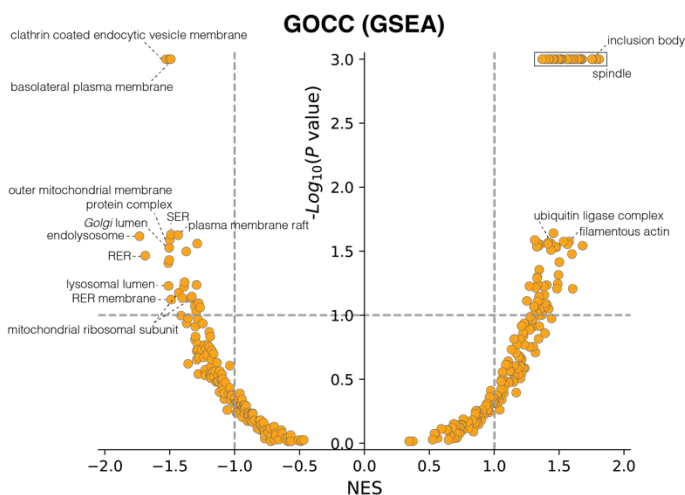

**E**

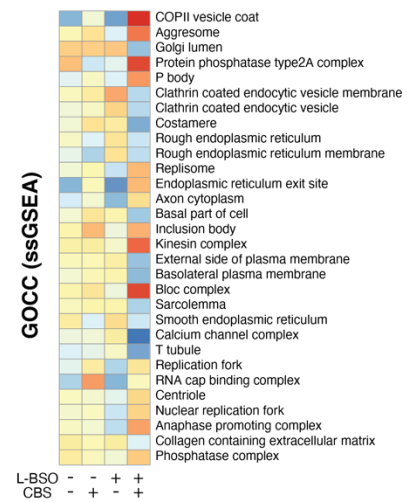

**F**

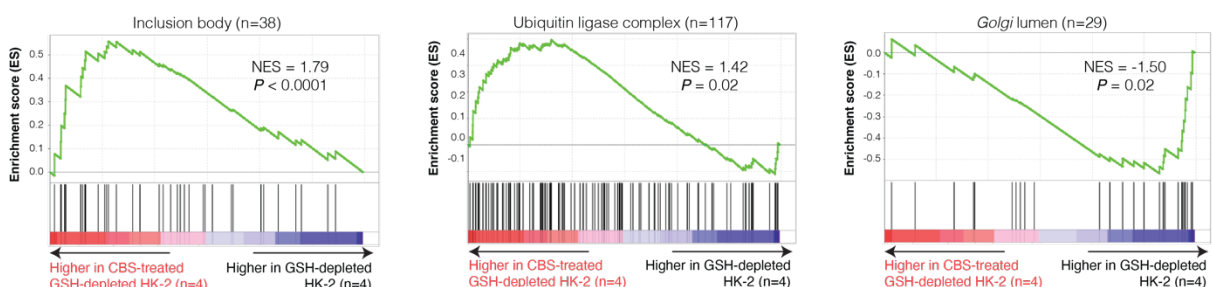

Fig. S4. GSEA analysis of proteomic changes in CBS-treated GSH-depleted HK-2 cells.

(A) Kegg GSEA analysis of proteins from control and CBS-treated GSH-depleted HK-2 cells. (B) Heatmap of altered pathways in perspective of Kegg (ssGSEA) from control and CBS-treated GSH-depleted HK-2 cells. Color of each cell represents the average ssGSEA enrichment scores of that pathway; red denotes activation and blue denotes suppression. White cells represent non-enrichment. CBS-treated HK-2 cells were also compared. (C) GSEA results visualizing Kegg pathways: ubiquitin mediated proteolysis, mismatch repair and cytosolic DNA sensing pathway. (D) GOCC GSEA analysis of proteins from control and CBS-treated GSH-depleted HK-2 cells. (E) Heatmap of altered pathways in perspective of GOCC (ssGSEA) control and CBS-treated GSH-depleted HK-2 cells. (F) GSEA results visualizing GOCC terms: inclusion body, ubiquitin ligase complex and *Golgi* lumen.

The cells were treated with 500  $\mu$ M CBS for 48h, or were treated with 500  $\mu$ M L-BSO for 24h to remove GSH and then cultured with 500  $\mu$ M CBS for extra 24h.
